1 **High-throughput whole-brain mapping of rhesus monkey at**  
2 **micron resolution**

3 Fang Xu<sup>1,2,12</sup>, Yan Shen<sup>3,12</sup>, Lufeng Ding<sup>3,12</sup>, Chao-Yu Yang<sup>3,12</sup>, Heng Tan<sup>4,5</sup>, Hao  
4 Wang<sup>1,6</sup>, Qingyuan Zhu<sup>1</sup>, Rui Xu<sup>7</sup>, Fengyi Wu<sup>2</sup>, Cheng Xu<sup>1</sup>, Qianwei Li<sup>1</sup>, Peng Su<sup>8</sup>, Li I.  
5 Zhang<sup>9</sup>, Hongwei Dong<sup>10</sup>, Robert Desimone<sup>7</sup>, Fuqiang Xu<sup>2,8,11</sup>, Xintian Hu<sup>4,11</sup>, Pak-Ming  
6 Lau<sup>3,6,\*</sup>, Guo-Qiang Bi<sup>1,2,6,11,\*</sup>

7 <sup>1</sup>Center for Integrative Imaging, Hefei National Laboratory for Physical Sciences at the  
8 Microscale, and School of Life Sciences, University of Science and Technology of China,  
9 Hefei, Anhui, China

10 <sup>2</sup>CAS Key Laboratory of Brain Connectome and Manipulation, Interdisciplinary Center for  
11 Brain Information, The Brain Cognition and Brain Disease Institute, Shenzhen Institutes  
12 of Advanced Technology, Chinese Academy of Sciences; Shenzhen-Hong Kong  
13 Institute of Brain Science-Shenzhen Fundamental Research Institutions, Shenzhen,  
14 Guangdong, China

15 <sup>3</sup>CAS Key Laboratory of Brain Function and Disease, and School of Life Sciences,  
16 University of Science and Technology of China, Hefei, Anhui, China

17 <sup>4</sup>Key Laboratory of Animal Models and Human Disease Mechanism, Kunming Institute of  
18 Zoology, Chinese Academy of Sciences, Kunming, Yunnan, China

19 <sup>5</sup>Department of Pathology and Pathophysiology, Kunming Medical University, Kunming,  
20 Yunnan, China

21 <sup>6</sup>Institute of Artificial Intelligence, Hefei Comprehensive National Science Center, Hefei,  
22 Anhui, China

23 <sup>7</sup>McGovern Institute for Brain Research, Massachusetts Institute of Technology,  
24 Cambridge, Massachusetts, USA

25 <sup>8</sup>State Key Laboratory of Magnetic Resonance and Atomic and Molecular Physics, Key  
26 Laboratory of Magnetic Resonance in Biological Systems, Wuhan Institute of Physics  
27 and Mathematics, Chinese Academy of Sciences, Wuhan, Hubei, China

28 <sup>9</sup>Zilkha Neurogenetic Institute, Center for Neural Circuits & Sensory Processing  
29 Disorders, Keck School of Medicine, University of Southern California, Los Angeles,  
30 California, USA

31 <sup>10</sup>USC Stevens Neuroimaging and Informatics Institute, Laboratory of Neuro Imaging  
32 (LONI), Keck School of Medicine of University of Southern California, Los Angeles,  
33 California, USA

34 <sup>11</sup>CAS Center for Excellence in Brain Science and Intelligence Technology, Shanghai,  
35 China

36 <sup>12</sup>These authors contributed equally

37 \*Correspondence: [gqbi@ustc.edu.cn](mailto:gqbi@ustc.edu.cn) (G.-Q.B.), [plau@ustc.edu.cn](mailto:plau@ustc.edu.cn). (P.-M.L.)

38

## 39 **Abstract**

40 Whole-brain mesoscale mapping of primates has been hindered by large brain size and  
41 the relatively low throughput of available microscopy methods. Here, we present an  
42 integrative approach that combines primate-optimized tissue sectioning and clearing with  
43 ultrahigh-speed, large-scale, volumetric fluorescence microscopy, capable of completing  
44 whole-brain imaging of a rhesus monkey at  $1\ \mu\text{m} \times 1\ \mu\text{m} \times 2.5\ \mu\text{m}$  voxel resolution within  
45 100 hours. A progressive strategy is developed for high-efficiency, long-range tracing of  
46 individual axonal fibers through the dataset of hundreds of terabytes, establishing a  
47 “Serial sectioning and clearing, 3-dimensional Microscopy, with semi-Automated  
48 Reconstruction and Tracing” (SMART) pipeline. This system supports effective  
49 connectome-scale mapping of large primates that reveals distinct features of  
50 thalamocortical projections of the rhesus monkey brain at the level of individual axonal  
51 fibers.

## 52 **Introduction**

53 Given the status of the rhesus macaque (*Macaca mulatta*) as a major experimental  
54 animal for modeling human cognitive functions and brain diseases<sup>1,2</sup>, a fundamental  
55 task in neuroscience and neurology is mapping structural connectivity among different  
56 brain regions and neurons (*i.e.*, the mesoscopic connectome) of the monkey brain<sup>3,4</sup>, as  
57 those established for the mouse brain<sup>5,6</sup>. Connectivity mapping of non-human primate  
58 brains has to date relied primarily on bulk labeling of specific brain regions with  
59 anterograde and retrograde tracers, followed by interleaved 2D imaging of serial thin  
60 sections<sup>7-9</sup>. However, this approach is tedious and lacks the continuity necessary for  
61 tracking individual axons throughout the brain.

62 Widely used tractography approaches based on diffusion-weighted magnetic resonance  
63 imaging (dMRI) are able to image the entire monkey or human brain as a whole, but  
64 their anatomical accuracy is inherently limited<sup>10-12</sup>. Light-sheet microscopy (LSM)  
65 combined with whole-brain clearing techniques can image intact mouse brains, but lacks  
66 the resolution to distinguish individual axons<sup>13-17</sup>. Recently developed block-face  
67 imaging techniques, including fluorescent micro-optical sectioning tomography (fMOST)  
68<sup>18</sup> and serial two-photon (STP) tomography<sup>19</sup>, have successfully implemented brain-wide  
69 axonal tracing in mice, and have opened a new era of connectomic mapping<sup>20, 21</sup>.  
70 However, given that these techniques require several days to image a mouse brain, it is  
71 impractical to scale up these methods toward systematic connectomic mapping for  
72 macaque or human brains.

73 To break these technical bottlenecks, we developed an integrative approach consisting  
74 of serial sectioning of the brain tissue into thick slices, clearing with primate-optimized  
75 uniform clearing solutions, microscopic imaging using ultrafast volumetric on-the-fly  
76 scanning, and a semi-automated process for volume reconstruction and axonal tracing.  
77 This “SMART” strategy and pipeline (Fig. 1a), owing to ultra-high speed and scalability,  
78 overcame several key technical challenges to enable high-resolution mapping of the  
79 entire macaque brain. In a proof-of-principle experiment, we generated a projection map  
80 from viral-labeled thalamic neurons to the cerebral cortex and unveiled distinct axonal  
81 routing patterns in the folded banks along the superior temporal sulcus (*sts*), and carried  
82 out efficient semi-automated tracing of neuronal fibers through the near petabyte dataset  
83 of the monkey brain.



## 84 **Results**

### 85 **Serial sectioning, clearing and high-throughput imaging of the macaque brain**

86 The first major challenge for imaging large brains is sample preparation. The difficulty of  
87 reagent penetration increases exponentially with tissue thickness, making it exceedingly  
88 difficult to achieve uniform histological staining or clearing of the whole monkey brain,  
89 which is more than 200 times larger than a mouse brain (Fig. 1b)<sup>8</sup>. We therefore chose  
90 to section the brain into slices before subsequent clearing and imaging. A robust  
91 workflow was established with hydrogel-based embedding to minimize tissue loss and  
92 distortion during sectioning and clearing (Supplementary Figs. 1 and 2; online Methods).  
93 A macaque brain was sectioned into about 250 consecutive 300- $\mu$ m slices which were  
94 treated with a primate-optimized uniform clearing method (PuClear) that combines Triton  
95 X-100-based gentle membrane permeabilization with high refractive index matching (Fig.  
96 1c). Unlike the widely used sodium dodecyl sulfate (SDS)-based clearing methods such  
97 as CLARITY<sup>13, 14</sup> that we found inadequate for imaging clearly through the white matter  
98 (WM) of primate tissue, PuClear has a refractive index of 1.52, yielding uniform  
99 transparency through the full depth of 300- $\mu$ m slices including WM areas (Fig. 1d, top  
100 panels). Importantly, PuClear preserves the morphology of neurons labeled by Nissl  
101 stain (Fig. 1d, bottom panels) and showed excellent compatibility for both  
102 immunostaining and retrograde tracing using cholera toxin subunit B (CTB)  
103 (Supplementary Figs. 3 and 4).

104 Uniform clearing of thick brain slices also allowed us to overcome a second major  
105 challenge, the long duration of time required for imaging a large brain at high resolution.  
106 For this, we developed a new iteration of our recently reported synchronized on-the-fly-  
107 scan and readout (VISoR) technique<sup>22</sup>. This improved "VISoR2" system is optimized for

108 ultrahigh-speed volumetric imaging of the larger monkey brain sections (Fig. 1e).  
109 Besides instrumental upgrades including long-travel linear stages and a more compact  
110 and stable light-path, the new system was implemented with an optimized control  
111 sequence for the sCMOS camera, the illumination laser, and the galvanometer scanner  
112 (Supplementary Fig. 5; online Methods).

113 We achieved 250 Hz blur-free imaging of a  $0.7 \times 2$  mm<sup>2</sup> field of view containing the optical  
114 section of the slice with smooth stage movement at any speed ranging from 0.5 to 20  
115 mm/s. This configuration corresponds to a voxel resolution of  $1.0 \times 1.0 \times (1.4 \sim 56)$   $\mu\text{m}^3$  and  
116 a continuous data rate of 400 million voxels per second (Supplementary Fig. 5;  
117 Supplementary Video 1). Thus the system is capable of imaging a mouse brain that is  
118 serially sectioned, cleared and mounted on a single glass slide within 30 min at  $1.0 \mu\text{m} \times$   
119  $1.0 \mu\text{m} \times 2.5 \mu\text{m}$  resolution. Consequently, the collection of  $\sim 80$  million single-channel  
120 images ( $2048 \times 788$  pixels each) for all slices from one macaque brain only took 94  
121 hours imaging time. This VISoR2-based imaging across three channels resulted in 750  
122 terabytes of data for a rhesus macaque brain that was labeled via co-injection of AAV  
123 cocktails mixed by an adeno-associated virus (AAV) carrying Cre recombinase and  
124 another AAV carrying Cre-dependent fluorescent proteins (FPs) reporter, either eGFP or  
125 mCherry, into the left and right superior colliculus (SC), respectively.

## 126 **Reconstruction of the entire macaque brain**

127 While the VISoR2 microscopy with significantly improved imaging speed overcame the  
128 second challenge in primate brain mapping, it generated a third challenge: the analysis  
129 of such large dataset. Available tools have been effective in handling terabyte-level  
130 multi-tile images, but these tools cannot be used for non-overlapped image tiles<sup>23,24</sup>, or  
131 lack automation for multi-hundred terabyte data<sup>25</sup>. We therefore developed a custom

132 software tool that implements automated volume stitching (Fig. 1f, Supplementary Fig.  
133 6), including rigid-transformation-based 3D intra-slice stitching (Fig. 1g) and non-rigid-  
134 transformation-based inter-slice alignment (Fig. 1h, Supplementary Video 2). Attesting  
135 the strong performance of this tool, we found that the intra-slice stitching errors were ~2  
136  $\mu\text{m}$  for each axis (Fig. 1i) and the inter-slice alignment error of AAV labeled axons was  
137 ~8  $\mu\text{m}$  (Fig. 1j). Importantly, tissue loss between consecutively sectioned slices was  
138 insignificant, as seen in the precise alignment of truncated cell bodies and axonal  
139 branches (Fig. 1k). As we demonstrate below, this precision was sufficient for visually  
140 tracing axonal projections. In practice, we reconstructed the whole brain at a coarse  
141 voxel resolution ( $10 \times 10 \times 10 \mu\text{m}^3$ ) to obtain an overview of brain structures, and also  
142 established a robust transformation framework for on-demand reconstruction of user-  
143 specified regions of interest (ROIs) at full resolution for detailed analysis of axonal  
144 projections (Fig. 1l-n, and Supplementary Fig. 7).

#### 145 **Mesoscopic mapping of thalamocortical projection**

146 To demonstrate the capacity of our system for mesoscopic mapping of neuronal  
147 projections across the entire monkey brain, we bilaterally injected AAV cocktails into the  
148 left and right medial dorsal nucleus of the thalamus (MD), with minor leakage to nearby  
149 areas (Supplementary Fig. 8). The MD is known to generate dense projections to the  
150 prefrontal cortex (PFC)<sup>26, 27</sup>. VISoR2 imaging and 3D reconstruction of this monkey  
151 brain allowed for visualization of the global distribution of axons originating from the  
152 injection sites and projecting to the cerebral cortex (Fig. 2a). From the 3D volume and a  
153 series of virtual sections, it was clear that bundled fibers from the injection sites traveled  
154 through the internal capsule in horizontal, obliquely lateral, and upward directions (Fig.  
155 2b, Supplementary Video 3), before continuing on towards the frontal lobe, where they  
156 primarily targeted the posterior orbitofrontal area (OFC) (Fig. 2c, Supplementary Fig. 9),

157 largely consistent with previous reports of the MD projections<sup>26, 28</sup>. Furthermore, the  
158 resolution of the original images was sufficient for us to visualize individual axons and  
159 branches, and to distinguish whether the fibers were passing by or making terminal  
160 arborizations. For instance, our PFC mapping revealed that labeled axons terminate in  
161 layer III and layer IV (Fig. 2d). Besides the canonical target areas of the MD in the  
162 ipsilateral PFC with high-density arborizations of labeled axons, we also observed  
163 various lower density, yet significant, fiber branches and arborizations in other areas  
164 such as the ipsilateral secondary somatosensory cortex (SII) (Fig. 2e,f), which is known  
165 to be a target of the ventral posterior inferior nucleus (VPI) and ventral posterolateral  
166 nucleus (VPL)<sup>29</sup>, and the temporal lobe, including superior temporal sulcus (*sts*) dorsal  
167 (TPO) and ventral (TEa) bank areas (Fig. 2e,g-h, Supplementary Fig. 9). All projection  
168 targets observed in this animal are summarized in Supplementary Table 1 and  
169 visualized in Fig. 2i in a cortical map after flattening (Supplementary Fig. 10). Thus, the  
170 high resolution and sensitivity of SMART imaging may help reveal previously unidentified  
171 cortical targets of the MD, although some of these observations could be due to  
172 inadvertent labeling of neurons in other nuclei close to the injection sites. More precise  
173 injection or a sparse labeling approach that allows complete single neuron tracing will  
174 help resolve such uncertainties and unveil detailed thalamocortical projection maps.

### 175 **SMART reveals distinct axonal routing strategies in local cortical folds**

176 The resolution of our system also allowed for identification of fine features of individual  
177 axons in the projection sites where the fibers were not excessively dense. As an  
178 example, we reconstructed a full-resolution volume of the areas near the *sts* and traced  
179 30 randomly selected axonal segments (Fig. 3a,b and Supplementary Video 4) using  
180 custom tracing software. Intriguingly, in these folded areas, the axons projecting to  
181 layers III/IV of the TEa typically navigated to the dorsal side first, before separating into

182 two major groups: one group made sharp turns in the WM (Fig. 3c, top panel), traveling  
183 along the boundary of the WM (Fig. 3c, bottom panel); the other group made right-angle  
184 turns and traveled through the superficial cortical layers (Fig. 3d). We observed 4 distinct  
185 classes of turning patterns for these axons (Fig. 3e-h). Such differences in the micro-  
186 organization of these afferent axons may underlie their functional diversity, especially  
187 when they make putative *en route* connections with different sets of neurons positioned  
188 within various local circuits.

### 189 **Brain-wide axonal tracing of macaque neurons**

190 With the capacity of resolving individual axons, we set out to trace the long-range,  
191 whole-brain projections of macaque axons but encountered yet another challenge.  
192 Whereas convenient tools have been developed for brain-wide tracing of individual  
193 axons in mouse<sup>20, 30-32</sup>, it is computationally challenging to scale up these tools to handle  
194 the whole brain volume of a macaque at full resolution. In addition, the reconstructed  
195 local image is often of somewhat lower quality than the raw image, partly because of  
196 errors introduced by non-linear deformation and interpolation steps that are implemented  
197 to achieve global consistency. Therefore, we developed a computationally efficient  
198 strategy for progressively tracing axons in blocks directly from raw images. For this, we  
199 first generated a relatively low resolution ( $10 \times 10 \times 10 \mu\text{m}^3$ ) reconstruction volume of  
200 the macaque brain, and established a “SMART positioning system” (SPS) that employs  
201 a set of bidirectional transformations to enable mapping between the initially defined  
202 whole-brain coordinate system and the corresponding data from each raw image (Fig.  
203 4a).

204 An iterative workflow was then established to trace the relatively sparsely labeled axons  
205 projecting to the contralateral hemisphere (Fig. 4b). In this scheme, bright fiber trunks

206 were first identified in the low-resolution whole-brain image, followed by semi-automatic  
207 tracing in full-resolution raw image blocks that were dynamically loaded as tracing  
208 progressed along the axon track; this process proceeded until reaching the injection site  
209 (where the fibers were too dense) (Fig. 4c) or reaching the nerve ending of each axonal  
210 branch (Fig. 4d,e). When necessary, any misalignment between adjacent slices from  
211 errors in the automatic registration process was manually corrected based on the  
212 continuity of foreground neuronal fibers and background microvasculature  
213 (Supplementary Fig. 11).

214 Using this progressive SMART tracing strategy, we tracked all 28 randomly selected  
215 bright fiber trunks retrogradely back into the injection site and anterogradely to their  
216 branching points. These fibers travel in parallel in a bundle within the internal capsule  
217 before branching out into divergent cortical areas (Supplementary Fig. 12; distances  
218 before branching:  $26.8 \pm 1.6$  mm;  $n=28$ ). We also selected 6 from those fiber trunks and  
219 mapped out their full terminal arborizations (Fig. 4f and Supplementary Video 5). For  
220 tracing each axon, only  $1.7 \pm 0.5$  % of raw images were sequentially accessed (total size  
221 of raw images: 238 TB; size of images accessed during tracing:  $4.1 \pm 1.2$  TB;  $n=6$ ), with  
222 multiple 600 MB image blocks ( $2048 \times 788 \times 200$  voxels each) loaded into the memory at  
223 each time, a workload manageable by a personal computer. Notably, most of these  
224 axonal fibers form clustered arborizations in confined cortical regions, with negligible  
225 subcortical arborizations ( $3.4 \pm 2.6$  % of total axonal length;  $n=6$ ), in striking contrast to  
226 the previously mapped mouse thalamic projections from the MD and nearby reunions  
227 nucleus (RE) (Supplementary Fig. 13; Supplementary Table 2).

228 **Discussion**

229 Owing to its implementation of optimized tissue slicing and clearing, ultrahigh-speed  
230 imaging techniques, and efficient analysis tools for processing near-petabyte-scale  
231 datasets, SMART bridges the gap in our understanding of functionally impactful  
232 differences between rodent and human brain architectures, specifically by enabling the  
233 efficient mapping of primate brains at subcellular resolution and supporting brain-wide,  
234 long-range tracing of individual axons. Indeed, our proof-of-concept study has already  
235 begun to reveal potential new targets of primate thalamocortical projections and to  
236 highlight distinct properties of individual axons, including their long trunks and striking  
237 turning patterns as they progress towards cortical targets. Although this initial study only  
238 allowed for tracing of a small number of single fibers because of the very dense labeling  
239 and relatively low throughput of semi-automatic axonal tracing, much sparser labeling is  
240 achievable by lowering the concentration of Cre recombinase-carrying AAV in the viral  
241 injection cocktail<sup>33,34</sup>, and combining with high-performance computing (HPC) and  
242 automated tracing techniques, it is expected that the SMART system will allow for  
243 mapping the full morphology of a potentially huge number of individual neurons<sup>20,30,35</sup>,  
244 thus paving the way toward a truly connectome-scale understanding of the primate  
245 brain.

246 It should also be noted that SMART is compatible with widely used experimental  
247 techniques for histological labeling, thereby supporting analysis of samples not  
248 amenable to viral labeling, for example postmortem human brains<sup>36</sup>. The strategies  
249 underlying SMART, including non-overlapped physical slicing and computational  
250 stitching, high-throughput blur-free imaging, and progressive tracing in the raw image  
251 stacks, are all readily scalable and applicable to other biological samples, including  
252 internal organs and even the whole bodies of various species that labeled with antero- or

253 retrograde transneuronal transporting viruses <sup>37</sup>. Application of these techniques have  
254 the potential to yield unprecedented understanding of brain architecture, and high-  
255 precision, systems-level insights about the development, basic functions, and  
256 neurological pathology of the entire nervous system.

257

258



259 **Methods**

260 **Labeling viruses**

261 For anterograde neural labeling, recombinant adeno-associated viruses (rAAVs) were  
262 generated by transient triple transfection of HEK293 cells as previously reported<sup>38</sup>. Cap  
263 serotype 9 was chosen to package the AAV vectors to achieve high transduction levels  
264 and high titers ( $>10^{12}$  vg/mL). A strong promoter CAG and transcription control element  
265 WPRE were chosen to construct pAAV-CAG-Dio-EGFP-WPRE-pA or pAAV-CAG-Dio-  
266 mCherry-WPRE-pA constructs for stable fluorescent protein (FP) expression in primates  
267<sup>39</sup>. To increase neuronal specificity, we used the hSyn promoter to construct pAAV-  
268 hSyn-Cre-WPRE-pA to serve as a controller of FP-expressing vectors.

269

270 **Mice**

271 Eight-week-old male C57BL/6 and Thy1-YFP-H (Jax: 003782) mice were used in this  
272 study for prototyping the sample preparation and imaging methods. All mice experiments  
273 were carried out following protocols approved by the Institutional Animal Care and Use  
274 Committees of the University of Science and Technology of China (USTC). All mice  
275 used in this study were group-housed with a 12-hour light/dark cycle (lights on at 7 a.m.)  
276 with free access to food and water.

277 4% hydrogel monomer solution (HMS) was prepared for perfusion by mixing 40% (w/v)  
278 acrylamide (4% final concentration; V900845, Sigma), 2% (w/v) bisacrylamide (0.05%  
279 final concentration; V3141, Promega), 10× phosphate buffer saline (PBS; 1× final  
280 concentration; 70011044, ThermoFisher), 8% (w/v) paraformaldehyde (PFA; 4% final  
281 concentration; 157-8, Electron Microscopy Sciences), distilled water, and VA-044  
282 thermal initiator (0.25% final concentration; 223-02112, Wako)<sup>13</sup>. The perfusion

283 procedures were carried out following a modified protocol based on a previous study<sup>22</sup>.  
284 Mice were deeply anesthetized with 1% sodium pentobarbital solution, followed by  
285 transcardial perfusion with 20 mL of 37°C PBS, 20 mL ice-cold PBS, and finally 20 mL of  
286 ice-cold 4% HMS. All solutions were perfused at a uniform rate of 10 mL/min. Mouse  
287 brains were harvested and immediately placed into 20 mL ice-cold 4% HMS and  
288 incubated at 4°C for 24-48 h to allow further diffusion of the hydrogel monomers into the  
289 tissue.

290

### 291 **Monkeys**

292 Three adult, 10-year-old, male rhesus macaques (*Macaca mulatta*) were used in this  
293 study. Macaques were obtained from the breeding colonies of the Primate Research  
294 Center of Kunming Institute of Zoology, Chinese Academy of Sciences (KIZ, CAS),  
295 which was accredited by the Association for Assessment and Accreditation of Laboratory  
296 Animal Care (AAALAC International). The experimental procedures were approved by  
297 the Institutional Animal Care and Use Committee (IACUC) of KIZ, CAS (IACUC No.  
298 IACUC18018).

299 In order to prevent gastric regurgitation caused by the anesthesia, fasting and water  
300 deprivation were implemented for at least 6 h before surgery. Animals were anesthetized  
301 using 10 mg/kg ketamine hydrochloride injection (i.m., 50 mg/mL, Zhong Mu Bei Kang  
302 pharmaceutical industry limited company, China) and maintained with 20 mg/kg  
303 pentobarbital sodium (i.m., 40 mg/mL, Merck, Germany). During the surgery, heart rate  
304 and core temperature were monitored using a rectal probe and ECG monitor. MRI  
305 assisted brain region positioning was used for accurate encephalic injection as  
306 previously described<sup>40</sup>. MRI scanning was performed using a 3-T scanner (uMR770,  
307 United Imaging, China) with a 12-channel knee coil. FP-expressing rAAVs (pAAV-CAG-

308 Dio-EGFP-WPRE-pA,  $4.70 \times 10^{12}$  vg/mL, 2  $\mu$ L, for the left hemispheres, or pAAV-CAG-  
309 Dio-mCherry-WPRE-pA,  $3.15 \times 10^{12}$  vg/mL, 2  $\mu$ L, for the right hemispheres) and Cre-  
310 expressing rAAVs (pAAV-hSyn-Cre-WPRE-pA,  $2.09 \times 10^{12}$  vg/mL, 2  $\mu$ L) were mixed at a  
311 1:1 ratio for each injection. In this study, a macaque was injected with these AAV  
312 cocktails at both sides of the superior colliculus (SC, AP:-4 mm; ML:  $\pm 3$  mm; DV:-38  
313 mm) and another macaque was injected with these mixtures at both sides of the  
314 mediodorsal nucleus (MD, AP: 1 mm; ML:  $\pm 3$  mm; DV: -38 mm). A third monkey was  
315 injected with a cholera toxin subunit B-Alexa Fluor 647 conjugate (CTB-AF647; C34778,  
316 Invitrogen) at the quadrigeminal cistern. The duration of injection was more than 20  
317 minutes (including 5 minutes each after inserting and before withdrawing the  
318 microsyringe). Antibiotics were used for 3 d after surgery. Injection sites were further  
319 confirmed from reconstructed whole-brain images.

320 Transcardial perfusions were carried out 8 weeks after surgery. Thirty min after  
321 anesthesia, each animal was sequentially perfused with the following solutions at the  
322 specified speed: PBS 8 L (37°C, 10 mL/s), PBS 1 L (4°C, 1.5 mL/s), 4% HMS 1L (4°C,  
323 1.5 mL/s), and 4% HMS 1 L (4°C, 0.3 mL/s). The brains were extracted immediately  
324 after perfusion within 30 min.

325

### 326 **Tissue embedding and slicing**

327 A post-fixation procedure with hydrogel was set up for crosslinking proteins and  
328 minimizing tissue loss. Immediately after the macaque brain was excised, it was  
329 immersed into 500 mL of 4% HMS and stored at 4°C for 1 week before embedding to  
330 allow penetration of the fixatives. Then the brain was immersed in the embedding  
331 solution, a 1:1 mixture of 4% HMS (2% final concentration) and 20% bovine serum  
332 albumin (BSA; 10% final concentration; V900933, Sigma), incubated at 4°C for 1 week,

333 polymerized at 37°C for 4-5 h, and washed 3 times in PBS to remove residual reagents.  
334 Embedding with the mixture of HMS and BSA provides not only *in situ* fixation of  
335 proteins<sup>13</sup>, but also high material stiffness and toughness for preserving slice integrity  
336 during sectioning (Supplementary Fig. 2). Embedded brains were sectioned into about  
337 250 pieces of 300- $\mu$ m-thick slices using a vibroslicer (Compresstome VF-800,  
338 Precisionary Instruments). All slices of each brain were collected and each slice was  
339 placed in a Petri dish with 40 mL PBS and stored at 4°C.

340

#### 341 **Sample clearing**

342 The PuClear clearing method was established based on previously reported CLARITY  
343 <sup>13</sup>, CUBIC <sup>17</sup> techniques with optimization for primate brain tissues, consisting of  
344 membrane permeabilization and refractive index (RI) matching. Brain slices were first  
345 treated with a high concentration Triton X-100 solution (5% in PBS; T928, Sigma) for 3-4  
346 d at 37°C with gentle shaking to adequately increase membrane permeability, and were  
347 then washed with PBS 3 times. High refractive index (RI) solution was prepared by  
348 mixing 50 wt% iohexol (29242990.99, Hisyn Pharmaceutical), 23 wt% urea (A600148-  
349 0002, Sangon), 11 wt% 2,2',2''-nitrioltriethanol (V900257, Sigma), and 16 wt% distilled  
350 water. The final refractive index of PuClear RI-matching solution is 1.52. Before imaging,  
351 brain slices mounted onto the glass substrates were incubated in this solution for at least  
352 1 h to allow the sample getting optically transparent.

353

#### 354 **Sample staining**

355 Staining was performed after PuClear perforation and before mounting. For immuno-  
356 labeling, membrane-perforated slices were placed into Petri dishes and immersed in  
357 blocking solution (5% (w/v) BSA in 0.3% PBST) overnight. After that, samples were

358 incubated with the primary antibody in 0.3% PBST for 3-4 d followed by 3 washes with  
359 PBS. Subsequently, samples were incubated with the secondary antibody in 0.3% PBST  
360 for 2-3 d, followed by 3 times washing with PBS. Dishes were kept at 4°C during  
361 blocking, staining, and washing with gentle shaking. For fluorescent Nissl staining, the  
362 blocking step was skipped and the slices were incubated with NT640 in 0.3% PBST for  
363 3-4 d at 37°C followed by washing 3 times with PBS. For DAPI staining, samples were  
364 incubated with DAPI stock solution for 1 d at 37°C followed by washing 3 times with  
365 PBS.

366 The following antibodies and dyes were used in this study (name, company, catalog  
367 number, dilution): Polyclonal Rabbit Anti-Glial Fibrillary Acidic Protein (GFAP), Dako,  
368 Z0334, 1:100; Anti-Tyrosine Hydroxylase Antibody, Milipore, MAB318, 1:500; Alexa  
369 Fluor 647 AffiniPure Donkey Anti-Mouse IgG (H+L), Jackson ImmunoResearch  
370 Laboratories, 715-605-151, 1:200; Alexa Fluor 488 AffiniPure Donkey Anti-Rabbit IgG  
371 (H+L), Jackson ImmunoResearch Laboratories, 711-545-152, 1:200; NeuroTrace  
372 640/660 Deep-Red Fluorescent Nissl Stain (NT640), ThermoFisher, N21483, 1:200;  
373 DAPI, Beyotime, C1006, stock solution.

374

### 375 **VISoR2 microscope**

376 We designed and built the VISoR2 microscope based on the VISoR technique described  
377 previously for mouse brain imaging<sup>22</sup>, with long-range sample stages and major  
378 upgrades for improving its stability, repeatability, as well as the practical imaging speed.  
379 The microscope was equipped with four lasers with wavelengths of 405 nm, 488 nm,  
380 552 nm, and 647 nm (all from Coherent). Incident light was combined and illuminated  
381 onto a galvo scanner (GVS011, Thorlabs). The position of the scanner was in  
382 conjugation with the back focal plane of an illumination objective (10X/NA 0.3, Olympus)

383 via two coupled relay lenses ( $F=150\text{mm}$ , Thorlabs). 1-D scanning of the scanner  
384 generated an illuminating plane that was overlapped with the focal plane of an imaging  
385 objective (10X/NA 0.3 or 20X/NA 0.5, both from Olympus). Emission light was filtered  
386 with bandpass filters (450/50, 520/40, 600/50, and 700/50 for the four laser sources,  
387 respectively; all from Semrock). Images were collected on a CMOS camera (Flash 4.0  
388 v3, Hamamatsu) through a tube lens (IX2-TLU, Olympus) and a 0.63X adapter (TV0.63,  
389 Olympus). The objectives were both positioned at a 45-degree incline to the samples. A  
390 linear stage (DDSM100, Thorlabs) and a stepper stage (LTS150, Thorlabs) were used  
391 for X- and Y-axis movements, respectively, and a stepper stage (MCZ20, Zaber) was  
392 used for Z movement.

393 The devices were controlled by custom software written in C++. To maximize the  
394 imaging throughput, the camera was aligned in the center of the light path and its  
395 readout was bi-directional in an “*external trigger syncreadout*” mode. During imaging, the  
396 X stage moved smoothly at a speed ranging from 0.5 mm/s to 20 mm/s for different  
397 resolution requirements. To avoid blurring due to motion, we synchronized the lasers,  
398 the scanner, the camera, and the stages with a DAQ board (NI PCIe-6374, National  
399 Instruments). The Y-step size was set to include 10% overlapped regions between  
400 adjacent image stacks.

401 Each time the X-stage finished accelerating and moved at a constant speed, it  
402 generated a rising edge signal which triggered a timer in the DAQ board to start  
403 signaling, continuously generating signals for lasers, the scanner, and the camera until  
404 imaging was complete, resulting a stack of image frames of the 45-degree oblique  
405 optical sections of the sample. 400 million voxels were acquired per second,  
406 approaching the maximum data rate of the CMOS camera. Multi-color imaging was

407 implemented by sequentially imaging individual channels and computationally registering  
408 all channels after all images were acquired.

409

#### 410 **Workstation**

411 The image acquisition software was run on a workstation equipped with an Intel Xeon  
412 E5-2680 CPU, an NVIDIA GTX 1060 graphics card, and 128 GB memory. It was  
413 equipped with 2 disk arrays each consisting of 8 SSDs configured in RAID5 for  
414 alternatively acquiring and transporting data to a remote petabyte storage server  
415 connected via 10 Gbps fiber-optic intranet. Windows 10 Pro 64-bit operating system was  
416 run on this workstation.

417

#### 418 **Data Management and Compression**

419 The VISoR2 system acquired about 20,000 image frames for a typical monkey brain  
420 slice, consisting of several image stacks, each generated during a one-way uniform  
421 motion of the X stage. We adopted the BigTIFF format instead of standard TIFF to allow  
422 storing all images of a slice into a single file sized ~200 GB with embedded OME-XML  
423 metadata, adapted to the Bio-Formats plugin in ImageJ/Fiji <sup>41, 42</sup>. We also forked this  
424 plugin to provide additional visualization features optimized to these large OME-TIFF  
425 images (<https://github.com/dinglufe/bioformats>). A single-channel VISoR2 image volume  
426 of a whole rhesus monkey brain contained  $\sim 1 \times 10^{14}$  voxels of 16-bit depth which  
427 occupies ~250 TB of storage. An efficient image compression method is necessary for  
428 handling such a large dataset, which requires not only a high compression ratio but also  
429 low computation resource consumption to compromise the heavy data load. We used  
430 the lossless Lempel–Ziv–Welch (LZW) algorithm to compress the raw images <sup>43, 44</sup>,  
431 which typically reached a compression ratio of 2:1. Furthermore, we also used a slightly

432 lossy compression strategy by truncating the 4 least significant bits and performing a  
433 proper rounding to the higher 12 bits of each 16-bit voxel value of the original images,  
434 followed by additional LZW compression. This method practically reaches a  
435 compression ratio of 8:1 with little computation time and CPU usage and worked in real-  
436 time during image acquisition. The theoretical peak-signal-noise-ratio (PSNR) of this  
437 method achieves 83.0, as determined by  $PSNR = 20 * \log_{10}(\frac{MAX_I}{\sqrt{MSE}})$ , where  $MAX_I$  equals  
438 65535, the maximum possible voxel value of a 16-bit image, and MSE is the rounding  
439 error, which was determined by  $MSE = (8^2 + 2 * \sum_{i=1}^7 i^2) / 2^4 = 21.5$ , supposing the  
440 values of the lower 4 bits follow a uniform distribution. More importantly, this method is  
441 seamlessly compatible with all visualization and analysis tools developed for TIFF  
442 images.

443

#### 444 **Automatic whole brain reconstruction**

445 The volume reconstruction was automatically performed by custom software written in  
446 Python.

447 **Intra-slice stitching.** Raw images of a brain slice were organized as a set of image  
448 stacks, with metadata of their physical positions recorded from the output of the X-, Y-,  
449 and Z- stages. Then raw image substacks from the overlapped region of two adjacent  
450 image stacks, each consisting of 100 continuous images, were sampled to calculate the  
451 stitching translation between these two stacks. The stitching translation was determined  
452 as the shift that minimized their normalized cross-correlation (NCC) in virtue of the open-  
453 source tool *elastix* (<http://elastix.isi.uu.nl>). The stitched image stacks were then  
454 generated by resampling raw images.



455 The precision of this intra-slice stitching method was calculated by evaluating the NCC  
456 between small random ROIs cut from the overlapped regions of two stitched stacks, with  
457 one stack fixed and the other moving in a 20 px × 20 px × 20 px window. The stitching  
458 error was determined as the shift that minimized the NCC and was further refined  
459 through quadratic interpolation of three points nearest to the NCC minimum and then  
460 taking the sub-pixel location corresponding to the minimum of the quadratic curve. The  
461 sub-pixel refinement formula is:

$$462 \quad x_{subpixel\ min,i} = x_i + \frac{n_{x_i+1} - n_{x_i-1}}{4n_{x_i} - 2n_{x_i+1} - 2n_{x_i-1}}$$

463 where  $x_i$  is the i-th axis position of the minimal value in the NCC array, and  $n_{x_i}$  is the  
464 NCC value at the position  $x_i$ .

465 **Channel alignment.** For calculating the precise displacement of each stack among  
466 sequential multi-channel imaging, one of the channels (usually the eGFP channel) was  
467 chosen as the reference channel and each other channel was aligned to the reference  
468 channel stack by stack. Several pairs of image substacks consisting of 100 continuous  
469 frames were sampled from both this channel and the reference channel at the edges of  
470 the brain slices detected by a brightness threshold. The contours of the brain slices  
471 provided autofluorescence features for computational alignment. The images were  
472 filtered using a gradient magnitude filter, then the translation between each pair of image  
473 substacks was calculated using the mutual information metric with *elastix*. The median  
474 value of the translation calculated from all the pairs of image substacks was determined  
475 as the displacement between this channel and the reference channel.

476 **Flattening.** The upper and lower surfaces of the brain slice in 3D images were identified  
477 and digitally flattened in this step. The upper and lower surfaces were represented by  
478 two images  $H_U$  and  $H_L$ . The value of  $H_U(x, y)$  or  $H_L(x, y)$  at any point  $(x, y)$  was defined as

479 the distance from the upper boundary of the 3D image to the upper or lower surface of  
480 the brain slice, respectively. Numerically,  $H_U$  and  $H_L$  were determined based on the  
481 optimization of 3 factors: (1) the value of the z-gradient image, which was generated by  
482 convolving the stitched image with a z-gradient filter; (2) the Laplacian of  $H_U$  and  $H_L$  as a  
483 smooth penalty of surface; (3) the distance between the upper and lower surfaces  
484 compared to the thickness of the slice (i.e. 300  $\mu\text{m}$  physical distance). With these  
485 constraints, in the areas surrounding cortical sulci and ventricles, the boundaries of brain  
486 slices detected by the gradient filter which were not real physical cuts were not  
487 recognized as slice surfaces. The stitched slice image was then digitally resliced and  
488 flattened by moving and scaling along the Z-direction for each pixel, assuming both the  
489 upper and lower surfaces were horizontal, and the distance between any pair of  $H_U(x, y)$   
490 and  $H_L(x, y)$  was 300  $\mu\text{m}$ . The sets of  $H_U$  and  $H_L$  for all slices were used for further inter-  
491 slice stitching and SPS positioning.

492 **Inter-slice stitching.** Adjacent slices were stitched together after flattening by  
493 registering the upper surfaces of the  $n$ -th slice and the lower surfaces of the  $(n-1)$ -th  
494 slice. The registration was performed by *elastix*, using metrics of *mutual information* and  
495 *rigidity penalty*. The deformation field of surfaces was globally optimized using the  
496 stochastic gradient descent (SGD) algorithm, by minimizing the average deformation of  
497 the surface image and the average displacement between the upper and lower surfaces  
498 of a slice. Image volumes of each brain slice were transformed according to the resultant  
499 deformation field and then stacked into the whole brain image volume. Errors of this  
500 interslice stitching method were evaluated by manually recognizing 500 random pairs of  
501 axonal segments cut by the vibroslicer, in the reconstructed image volume of the brain  
502 hemisphere ipsilaterally injected with AAV-GFP into the MD, and calculating the average  
503 shift between the ends of fibers crossing those stitched surfaces.

504 **Visualization.** The whole monkey brain image was reconstructed at  $10 \times 10 \times 10 \mu\text{m}^3$   
505 voxel resolution. The reconstruction software also supports reconstructing ROIs of user-  
506 specified locations and sizes at full resolution. The image volumes of the whole brain or  
507 a given ROI were converted to the Imaris file format (IMS) for visualization in Imaris  
508 (v9.1~9.5, Oxford Instruments) or in our custom software, Lychnis (see below). The IMS  
509 format is based on the standard hierarchical data format 5 (HDF5), which is open source  
510 and supports large image data. File format conversion was performed with the Imaris  
511 File Converter (v9.2, Oxford Instruments).

512 **SMART positioning system (SPS).** A positioning system was established to  
513 bidirectionally map the pixels in the raw images to the reconstructed brain or ROIs. The  
514 positioning system contains three spaces: (1) Raw-image space  $S_1(s, k, x_r, y_r, z_r)$ , where  
515 the arguments represent slice ( $s$ ), stack ( $k$ ), frame ( $x_r$ ), row ( $y_r$ ), and stack ( $z_r$ ) numbers  
516 of a pixel in  $S_1$ ; (2) Intra-slice-stitched-image space  $S_2(s, x_i, y_i, z_i)$  where the arguments  
517 represent the 3D position of a point ( $x_i, y_i, z_i$ ) at a stitched 3D slice ( $s$ ) image; (3)  
518 Reconstructed-volume space  $S_3(x_v, y_v, z_v)$ . The coordinate mapping between spaces are  
519 based on bidirectional transformations across the three spaces: (1) Resampling  
520 transformation between  $S_1$  and  $S_2$ , consisting of a set of affine transformations each  
521 applied to an image stack; (2) Reconstruction transformation between  $S_2$  and  $S_3$ ,  
522 consisting of a group of displacement fields each applied for a slice image. This system  
523 is also extensible to the atlas space when necessary.

524

## 525 **Mesosopic analysis**

526 **Fiber orientation analysis.** We visualized fiber orientation by applying structure tensor  
527 analysis<sup>45</sup> on a low-resolution ( $10 \times 10 \times 10 \mu\text{m}^3$  voxel resolution) reconstruction of the  
528 whole brain volume. The structure tensor is defined as:

529 
$$ST_{\rho}(\nabla f) = g_{\rho} * (\nabla f \nabla f^T),$$

530 where  $\nabla f$  is the gradient of the intensity  $f(x, y, z)$ , of the reconstructed 3D image.  $g_{\rho}$  is a  
531 3D Gaussian kernel with standard deviation  $\rho$ , set as 1 pixel here.

532 Fiber orientation  $f_{vis}$  was given by the product of the secondary eigenvalue  $\lambda_2$  and  
533 eigenvector  $\mathbf{v}_2$  of the structure tensor  $ST_{\rho}(\nabla f)$ :

534 
$$(f_{vis,x}, f_{vis,y}, f_{vis,z}) = \lambda_2 \mathbf{v}_2$$

535 The resulted fiber orientation image was rendered and visualized in Imaris using the  
536 *blend* mode. The  $x$ ,  $y$ , and  $z$  components of this fiber orientation image were rendered  
537 using red, green, and blue colors, respectively.

538 **Cortical flattening.** Surfaces of pial/gray (*pial*) and gray/white (*white*) boundaries were  
539 reconstructed based on structural MRI images (T1 MPRAGE,  $250 \times 250 \times 500 \mu\text{m}^3$ ) of the  
540 same animal using Freesurfer<sup>46</sup> and custom Matlab (Mathworks) scripts. The mid  
541 surface between *pial* and *white* surfaces was inflated, and then 4 cuts were made to  
542 flatten the surface for visualization purposes (Supplementary Fig. 10). Cortical thickness  
543 was estimated by comparing *pial* and *white* surfaces. Atlas areas<sup>47</sup> were labeled onto  
544 the flattened surface based on nonlinear co-registration between the MRI of the test  
545 animal and the MRI template of the atlas, which were both nonlinearly warped to the  
546 National Institute of Mental Health Macaque Template<sup>48,49</sup>, serving as a common  
547 template. MD projection areas were determined by manually registering the coronal  
548 sections from the reconstructed whole-brain image to the atlas.

549 **Parcellation.** Cortical area identification was based on manually matching the DAPI,  
550 NT640 or autofluorescence images of the slices to the atlas<sup>47</sup> in the MIP images of each  
551 slice. Cortical layers were identified from the Nissl images or cellular autofluorescence in  
552 eGFP or mCherry channels.

553

554 **Fiber tracing**

555 We developed a software referred to as “Lychnis” for tracing axonal fibers in a 3D image  
556 block generated by multiple imaging modules, or in the whole image set generated by  
557 the SMART pipeline, in which the users can mark nodes along the axonal tracks semi-  
558 automatically.

559 **Fiber tracing in volume blocks.** A reconstructed image volume at specified ROIs  
560 generated by the reconstruction software was converted to IMS format. Using high-level  
561 HDF5 API, small image blocks of a given size, e.g. 256×256×256 pixels at user-  
562 specified resolution and location, can be loaded from the IMS file in Lychnis, taking  
563 advantage of the multi-resolution structure and chunk-wise layout of HDF5. The  
564 Visualization Toolkit (VTK)<sup>50</sup> and Virtual Finger technology<sup>51,52</sup> are used in Lychnis for  
565 3D rendering and interactive labeling. Semi-automatic tracing was implemented by  
566 annotating two nearby markers in the axon and the tracks were automatically extended  
567 by linear extrapolation and manual correction when necessary. The nearby image blocks  
568 were automatically loaded for continuous tracing.

569 When necessary, misalignment that occurred during whole-brain reconstruction between  
570 adjacent slices resulting from the imperfect automatic volume reconstruction was  
571 manually corrected by virtue of the continuity of neuronal fibers and blood vessels in  
572 Lychnis. This software provides a user interface showing 3D visualization of two  
573 adjacent slice volumes, implemented with VTK, for the users to interactively mark the  
574 breakpoints of fibers on the surfaces of both slices. Then the deformation fields of all  
575 slices could be calculated based on these markers, using the interpolation library nn<sup>53</sup>.  
576 Lychnis also provides bidirectional transformation between the image coordinate

577 systems before and after deformation that was also integrated in the SMART positioning  
578 system.

579 **Fiber tracing in whole macaque brains.** Brain-wide axonal tracing was performed in  
580 the raw-image space with an adaptive and progressive approach implemented in  
581 Lychnis. All of the raw image stacks of the whole macaque brain were stored in OME-  
582 TIFF format at a remote data center. Lychnis provided a dynamic mechanism for loading  
583 and displaying the raw data while tracing. The starting axonal points or segments were  
584 selected in the low-resolution whole brain, and their locations were mapped to the raw-  
585 image coordinate system  $S_1$  via SPS. A block of raw images centering these points was  
586 loaded and assembled in memory by shifting individual images and rotating this local  
587 image block for 3D visualization in the Lychnis user interface. Tracing in this image block  
588 could be performed by the same semi-automatic algorithm for tracing in volumes of  
589 interests. When the fiber segment in the current slice was fully traced, the SPS  
590 converted the position of the last annotated point to a location in the whole-brain  
591 coordinate space  $S_3$ ,  $(x_n, y_n, z_n)$ , and then converted the nearby point  $(x_n, y_n, z_n + \epsilon)$  back  
592 to the raw-image space and loaded the corresponding image block, where  $\epsilon$  was set to  
593 make sure  $z_n$  and  $z_n + \epsilon$  located in two neighboring slices. The fibers were traced with this  
594 iterative and progressive strategy block-by-block from the initial starting point or point set  
595 both anterogradely along the axon tracks to their endings in all branches, or retrogradely  
596 to the virus injection sites. In this study, axons from the injection site in the left  
597 hemisphere labeling MD and neighboring RE areas sparsely projecting to the  
598 contralateral cortical areas were traced. A few axons with significantly higher brightness  
599 could also be identified and traced out from dense ipsilateral fiber bundles. After fiber  
600 tracing was completed, all the points in the tracks were converted to the whole-brain

601 space  $S_3$  for visualization. Completed tracing results were reviewed by two independent  
602 annotators, and the consensus axon tracks were used for the analysis<sup>19,20</sup>.

603 **3D rendering.** A GPU-accelerated renderer was created and integrated into Lychnis for  
604 3D rendering and creating videos. Imaris was also used for 3D rendering and creating  
605 videos.

606

607 **Acknowledgments**

608 We thank Y. Song, M. Zhang, S. Zhao, T. Wang for their technical assistance with  
609 sample preparation and imaging. We thank Dr. Y. Guo and K. Zhang for viral validation  
610 in mice. We thank Dr. Yanyang Xiao, Dr. Shuo Chen, Dr. Pengcheng Zhou and Dasheng  
611 Bi for valuable suggestions on the manuscript. This work was supported by the Strategic  
612 Priority Research Program of Chinese Academy of Science (XDB32030200), the  
613 National Natural Science Foundation of China (91732304), the Key-Area Research and  
614 Development Program of Guangdong Province (2018B030331001; 2018B030338001),  
615 Shenzhen Infrastructure for Brain Analysis and Modeling (ZDKJ20190204002), and by  
616 Chinese Academy of Sciences International Partnership Program  
617 (172644KYSB20170004). Q.Z., L.I.Z., H.D., P.-M. L. and G.-Q.B were also partially  
618 supported by the NIH BICCN program (U01MH116990).

619

620 **Author contributions**

621 Fang Xu, L.I.Z., H.D., Fuqiang Xu, X.H., P.-M. L. and G.-Q.B. conceptualize the project.  
622 Fang Xu led this project under supervision of P.-M. L. and G.-Q.B.. Fang Xu, Y.S. and  
623 H.W. established the pipeline for whole macaque brain imaging. Fang Xu, Q.Z., H.W.  
624 and C.X. designed and set up the microscope. Y.S. performed sample preparation and  
625 acquired data. L.D. developed the software for image acquisition, visualization, and  
626 neuronal tracing. C.Y. developed the software for brain reconstruction. H.T. and X.H.  
627 injected viruses and prepared the macaques brain samples. Fang Xu, Y.S., C.Y., F.W.,  
628 and R.X. analyzed the data. Q.L. developed tools for image preprocessing. P.S. and  
629 Fuqiang Xu validated and provided the tracing viruses. H.D. and R.D. provided valuable



630 neuroanatomical insights. Fang Xu, P.-M. L., and G.-Q.B. wrote the manuscript with  
631 inputs from all the authors.

632

### 633 **Competing interests**

634 The authors have applied for a patent on the technology related to this work.

635

### 636 **Data and materials availability**

637 All codes used in this study are provided upon request. All data required to evaluate the  
638 conclusions in the paper are present in the paper or the supplementary materials. The  
639 complete imaging datasets of macaque brains exceed 1 petabyte, and therefore  
640 impractical to upload to a public data repository. The subsets related to any figure or  
641 video in this work are freely available upon request and providing feasible data transfer  
642 mechanisms (such as physical hard disk drives, cloud storage, or onsite visiting).

643

### 644 **References**

- 645 1. Belmonte, J.C.I. et al. Brains, Genes, and Primates. *Neuron* **86**, 617-631 (2015).
- 646 2. Poo, M.-m. et al. China Brain Project: Basic Neuroscience, Brain Diseases, and Brain-  
647 Inspired Computing. *Neuron* **92**, 591-596 (2016).
- 648 3. Markov, N.T. et al. Cortical High-Density Counterstream Architectures. *Science* **342**,  
649 1238406 (2013).
- 650 4. Wang, X.-J. & Kennedy, H. Brain structure and dynamics across scales: in search of rules.  
651 *Current Opinion in Neurobiology* **37**, 92-98 (2016).
- 652 5. Kleinfeld, D. et al. Large-Scale Automated Histology in the Pursuit of Connectomes. *The*  
653 *Journal of Neuroscience* **31**, 16125-16138 (2011).
- 654 6. Zeng, H. Mesoscale connectomics. *Current Opinion in Neurobiology* **50**, 154-162 (2018).
- 655 7. Schmahmann, J. & Pandya, D. Fiber pathways of the brain. (Oxford University Press,  
656 New York, 2009).

- 657 8. Lin, M.K. et al. A high-throughput neurohistological pipeline for brain-wide mesoscale  
658 connectivity mapping of the common marmoset. *eLife* **8**, e40042 (2019).
- 659 9. Felleman, D.J. & Van Essen, D.C. in *Cereb cortex* (Citeseer, 1991).
- 660 10. Jones, D.K., Knösche, T.R. & Turner, R. White matter integrity, fiber count, and other  
661 fallacies: The do's and don'ts of diffusion MRI. *NeuroImage* **73**, 239-254 (2013).
- 662 11. Thomas, C. et al. Anatomical accuracy of brain connections derived from diffusion MRI  
663 tractography is inherently limited. *Proceedings of the National Academy of Sciences* **111**,  
664 16574-16579 (2014).
- 665 12. Liu, C. et al. A resource for the detailed 3D mapping of white matter pathways in the  
666 marmoset brain. *Nature Neuroscience* **23**, 271-280 (2020).
- 667 13. Chung, K. et al. Structural and molecular interrogation of intact biological systems.  
668 *Nature* **497**, 332-337 (2013).
- 669 14. Tomer, R., Ye, L., Hsueh, B. & Deisseroth, K. Advanced CLARITY for rapid and high-  
670 resolution imaging of intact tissues. *Nature Protocols* **9**, 1682 (2014).
- 671 15. Zhao, S. et al. Cellular and Molecular Probing of Intact Human Organs. *Cell* **180**, 796-  
672 812.e719 (2020).
- 673 16. Ueda, H.R. et al. Whole-Brain Profiling of Cells and Circuits in Mammals by Tissue  
674 Clearing and Light-Sheet Microscopy. *Neuron* **106**, 369-387 (2020).
- 675 17. Susaki, E.A. et al. Whole-brain imaging with single-cell resolution using chemical  
676 cocktails and computational analysis. *Cell* **157**, 726-739 (2014).
- 677 18. Gong, H. et al. High-throughput dual-colour precision imaging for brain-wide  
678 connectome with cytoarchitectonic landmarks at the cellular level. *Nature*  
679 *Communications* **7**, 12142 (2016).
- 680 19. Economo, M.N. et al. A platform for brain-wide imaging and reconstruction of individual  
681 neurons. *eLife* **5**, e10566 (2016).
- 682 20. Winnubst, J. et al. Reconstruction of 1,000 Projection Neurons Reveals New Cell Types  
683 and Organization of Long-Range Connectivity in the Mouse Brain. *Cell* **179**, 268-  
684 281.e213 (2019).
- 685 21. Wang, Y. et al. Complete single neuron reconstruction reveals morphological diversity in  
686 molecularly defined claustral and cortical neuron types. *bioRxiv*, 675280 (2019).
- 687 22. Wang, H. et al. Scalable volumetric imaging for ultrahigh-speed brain mapping at  
688 synaptic resolution. *National Science Review* **6**, 982-992 (2019).
- 689 23. Bria, A. & Iannello, G. TeraStitcher - A tool for fast automatic 3D-stitching of teravoxel-  
690 sized microscopy images. *BMC Bioinformatics* **13**, 316 (2012).
- 691 24. Hörl, D. et al. BigStitcher: reconstructing high-resolution image datasets of cleared and  
692 expanded samples. *Nat Methods* **16**, 870-874 (2019).
- 693 25. Hayworth, K.J. et al. Ultrastructurally smooth thick partitioning and volume stitching for  
694 large-scale connectomics. *Nat Methods* **12**, 319-322 (2015).
- 695 26. Ray, J.P. & Price, J.L. The organization of projections from the mediodorsal nucleus of  
696 the thalamus to orbital and medial prefrontal cortex in macaque monkeys. *J Comp*  
697 *Neurol* **337**, 1-31 (1993).
- 698 27. Parnaudeau, S., Bolkan, S.S. & Kellendonk, C. The Mediodorsal Thalamus: An Essential  
699 Partner of the Prefrontal Cortex for Cognition. *Biological Psychiatry* **83**, 648-656 (2018).
- 700 28. Giguere, M. & Goldman-Rakic, P.S. Mediodorsal nucleus: Areal, laminar, and tangential  
701 distribution of afferents and efferents in the frontal lobe of rhesus monkeys. *Journal of*  
702 *Comparative Neurology* **277**, 195-213 (1988).

- 703 29. Friedman, D.P. & Murray, E.A. Thalamic connectivity of the second somatosensory area  
704 and neighboring somatosensory fields of the lateral sulcus of the macaque. *Journal of*  
705 *Comparative Neurology* **252**, 348-373 (1986).
- 706 30. Gao, R. et al. Cortical column and whole-brain imaging with molecular contrast and  
707 nanoscale resolution. *Science* **363**, eaau8302 (2019).
- 708 31. Bria, A., Iannello, G., Onofri, L. & Peng, H. TeraFly: real-time three-dimensional  
709 visualization and annotation of terabytes of multidimensional volumetric images. *Nat*  
710 *Methods* **13**, 192-194 (2016).
- 711 32. Wang, Y. et al. TeraVR empowers precise reconstruction of complete 3-D neuronal  
712 morphology in the whole brain. *Nature Communications* **10**, 3474 (2019).
- 713 33. Luo, L., Callaway, E.M. & Svoboda, K. Genetic Dissection of Neural Circuits: A Decade of  
714 Progress. *Neuron* **98**, 256-281 (2018).
- 715 34. Lin, R. et al. Cell-type-specific and projection-specific brain-wide reconstruction of single  
716 neurons. *Nature Methods* **15**, 1033-1036 (2018).
- 717 35. Friedmann, D. et al. Mapping mesoscale axonal projections in the mouse brain using a  
718 3D convolutional network. *Proceedings of the National Academy of Sciences* **117**, 11068-  
719 11075 (2020).
- 720 36. Glasser, M.F. et al. A multi-modal parcellation of human cerebral cortex. *Nature* **536**,  
721 171-178 (2016).
- 722 37. Levinthal, D.J. & Strick, P.L. Multiple areas of the cerebral cortex influence the stomach.  
723 *Proceedings of the National Academy of Sciences* **117**, 13078-13083 (2020).
- 724 38. Jungmann, A., Leuchs, B., Rommelaere, J., Katus, H.A. & Müller, O.J. Protocol for  
725 efficient generation and characterization of adeno-associated viral vectors. *Human gene*  
726 *therapy methods* **28**, 235-246 (2017).
- 727 39. Wu, S.H. et al. Comparative study of the transfection efficiency of commonly used viral  
728 vectors in rhesus monkey (*Macaca mulatta*) brains. *Zool Res* **38**, 88-95 (2017).
- 729 40. Jing, W. et al. A new MRI approach for accurately implanting microelectrodes into deep  
730 brain structures of the rhesus monkey (*Macaca mulatta*). *Journal of Neuroscience*  
731 *Methods* **193**, 203-209 (2010).
- 732 41. Linkert, M. et al. Metadata matters: access to image data in the real world. *The Journal*  
733 *of cell biology* **189**, 777-782 (2010).
- 734 42. Goldberg, I.G. et al. The Open Microscopy Environment (OME) Data Model and XML file:  
735 open tools for informatics and quantitative analysis in biological imaging. *Genome*  
736 *biology* **6**, R47 (2005).
- 737 43. Ziv, J. & Lempel, A. Compression of individual sequences via variable-rate coding. *IEEE*  
738 *transactions on Information Theory* **24**, 530-536 (1978).
- 739 44. Welch, T.A. A technique for high-performance data compression. *Computer*, 8-19  
740 (1984).
- 741 45. Schilling, K.G. et al. Histological validation of diffusion MRI fiber orientation distributions  
742 and dispersion. *Neuroimage* **165**, 200-221 (2018).
- 743 46. Fischl, B. FreeSurfer. *Neuroimage* **62**, 774-781 (2012).
- 744 47. Saleem, K.S. & Logothetis, N.K. A combined MRI and histology atlas of the rhesus  
745 monkey brain in stereotaxic coordinates. (Academic Press, 2012).
- 746 48. Van Essen, D.C., Glasser, M.F., Dierker, D.L. & Harwell, J. Cortical Parcellations of the  
747 Macaque Monkey Analyzed on Surface-Based Atlases. *Cerebral Cortex* **22**, 2227-2240  
748 (2011).
- 749 49. Seidlitz, J. et al. A population MRI brain template and analysis tools for the macaque.  
750 *Neuroimage* **170**, 121-131 (2018).

- 751 50. Schroeder, W.J., Lorensen, B. & Martin, K. The visualization toolkit: an object-oriented  
752 approach to 3D graphics. (Kitware, 2004).
- 753 51. Peng, H. et al. Virtual finger boosts three-dimensional imaging and microsurgery as well  
754 as terabyte volume image visualization and analysis. *Nature communications* **5**, 4342  
755 (2014).
- 756 52. Peng, H., Bria, A., Zhou, Z., Iannello, G. & Long, F. Extensible visualization and analysis  
757 for multidimensional images using Vaa3D. *Nature Protocols* **9**, 193 (2014).
- 758 53. Fan, Q., Efrat, A., Koltun, V., Krishnan, S. & Venkatasubramanian, S. in ALENEX/ANALCO  
759 111-120 (2005).
- 760 54. Morphological data of 8 mouse MD neurons and 2 RE neurons were from the  
761 MouseLight project. Neuron IDs: AA0054 (DOI: 10.25378/janelia.5521765), AA0055  
762 (DOI: 10.25378/janelia.5521768), AA0094 (DOI: 10.25378/janelia.5526661), AA0095  
763 (DOI: 10.25378/janelia.5526664), AA0138 (DOI: 10.25378/janelia.5527288), AA0353  
764 (DOI: 10.25378/janelia.5526664), AA0363 (DOI: 10.25378/janelia.7613897), AA0368  
765 (DOI: 10.25378/janelia.7613912), AA0370 (DOI: 10.25378/janelia.7613921) and AA0371  
766 (DOI: 10.25378/janelia.7613924).

767 **Figures**

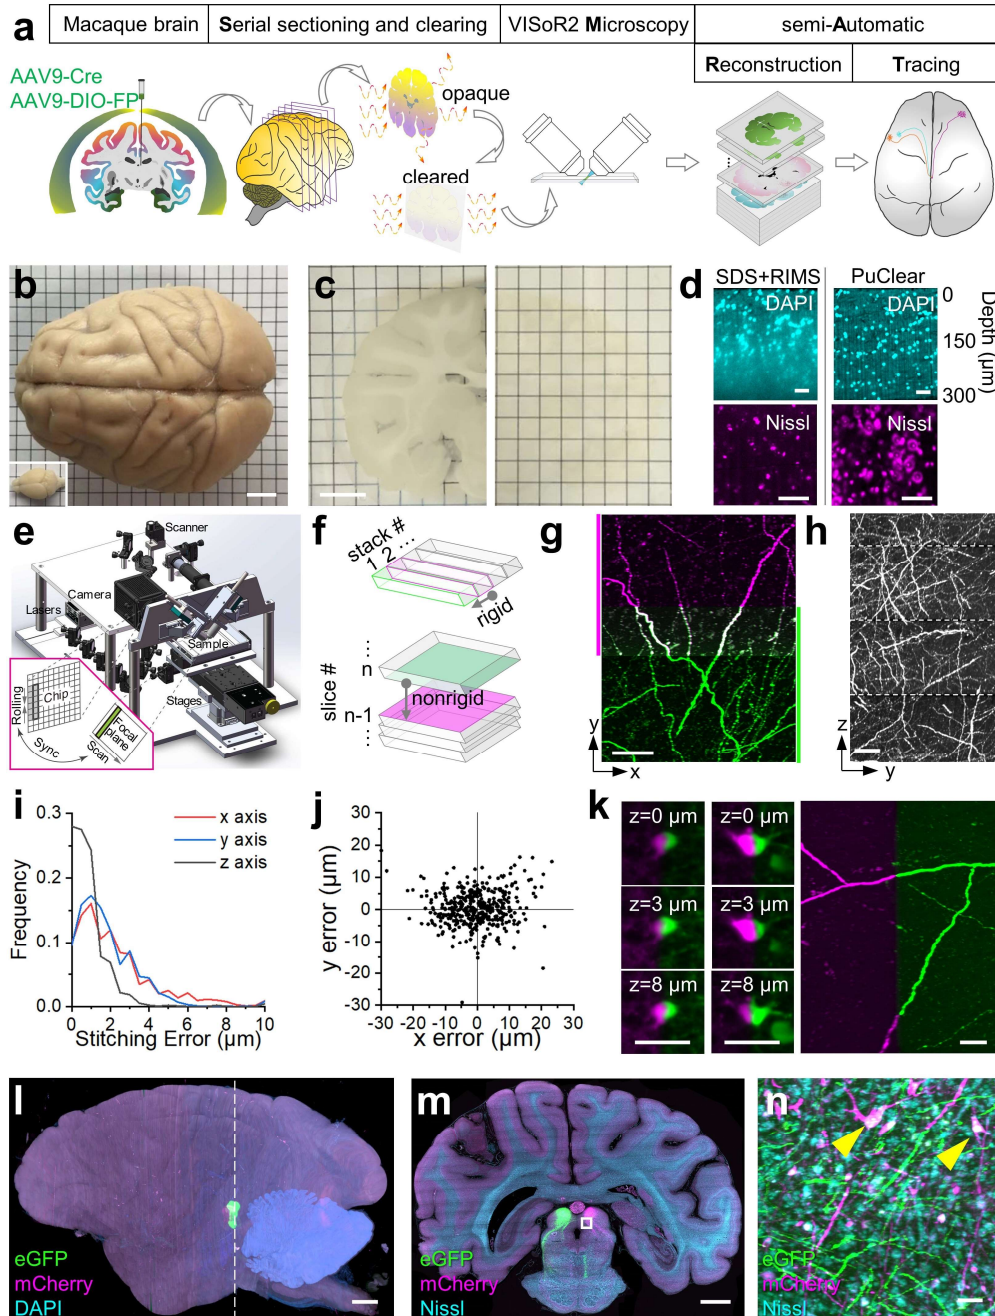

768

769 **Fig. 1 | The SMART approach for high-throughput mapping of a rhesus macaque**  
 770 **brain at micron resolution. (a)** The SMART pipeline. **(b)** A macaque brain compared  
 771 with a mouse brain (bottom left). **(c)** A macaque brain slice before (left) and after (right;  
 772 flipped) PuClear treatment. **(d)** Comparison between SDS- and RIMS-based clearing,

773 and PuClear treatment. Top panels: WM areas stained with DAPI. Bottom panels:  
774 cortical areas stained with a fluorescent Nissl dye, NT640. **(e)** The VISoR2 imaging  
775 system. Inset: a schematic showing the synchronization mechanism between laser  
776 scanning and camera readout. **(f)** A schematic for volume stitching within a single slice  
777 (top) and between slices (bottom). **(g)** Maximum intensity projection (MIP) image of a  
778 100- $\mu\text{m}$  coronal section of two adjacent stacks (separately color-coded) with merged  
779 overlapped regions after stitching. **(h)** MIP of a 50- $\mu\text{m}$  virtual section from 4 consecutive  
780 slices. **(i-j)** Distributions of the errors of intra-slice (i) and inter-slice (j) stitching. **(k)**  
781 Stitched neurons (each shown in 3 z-sections) and axonal branches cut into two  
782 adjacent brain slices (separately color-coded). **(l)** A reconstructed macaque brain with  
783 viral labeling of bilateral SC areas. **(m)** MIP of a 30- $\mu\text{m}$  coronal section indicated with a  
784 dashed line in (l). **(n)** Magnified view of the boxed region in (m). Arrowheads indicate  
785 neurons co-labeled by the virus and fluorescent Nissl staining. Scale bars: (b), (c), 10  
786 mm; (d), (k) and (n), 50  $\mu\text{m}$ ; (g-h), 100  $\mu\text{m}$ ; (l) and (m), 5 mm.  
787



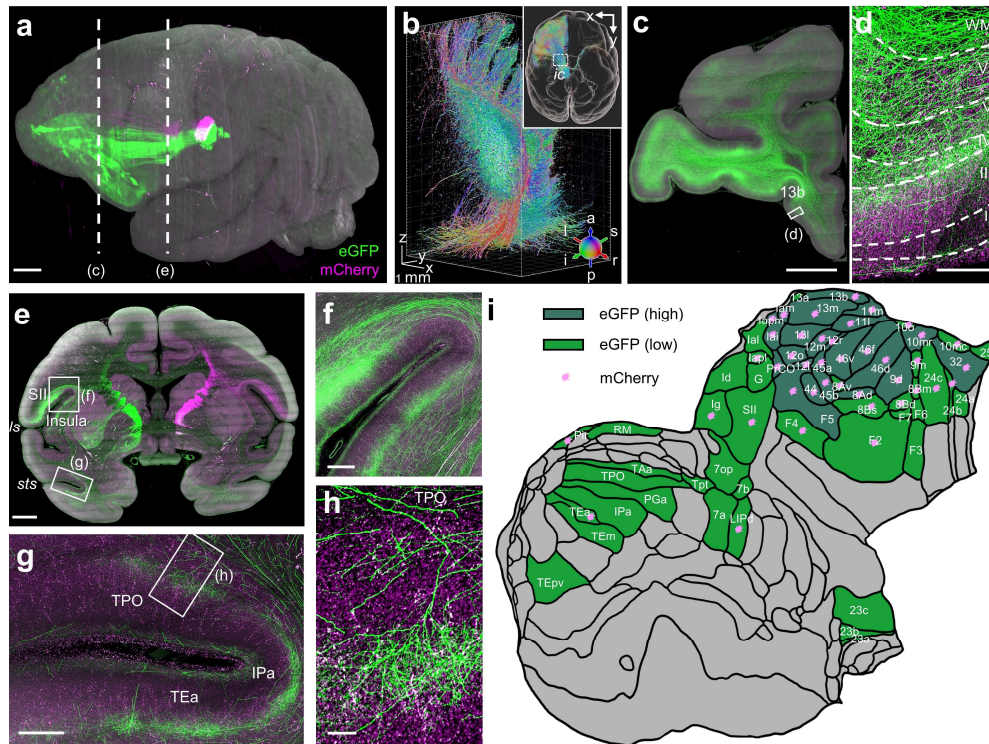

788

789 **Fig. 2 | Mesoscopic mapping of the MD projection.** (a) A reconstructed macaque  
 790 brain with viral labeling of bilateral MD areas. (b) Fiber orientation image of the brain  
 791 (inset) and a magnified view of the left *ic* (box region). Only the eGFP channel is  
 792 displayed, where red, green, and blue colors represent the right/left, anterior/posterior,  
 793 and superior/inferior orientations, respectively. (c-h) MIPs of two 300- $\mu$ m coronal  
 794 sections (c, e), and the magnified views (d, f, g, h) of the boxed regions specified in (c),  
 795 (e), and (g). Cortical layers were drawn based on the autofluorescence patterns in each  
 796 channel. (i) Summarized cortical flat map showing high- and low-density distribution of  
 797 axonal projections to the ipsilateral hemisphere from the injection sites revealed by  
 798 eGFP and mCherry expression. Scale bars: (a), (c), (e), 5 mm; (d), (g), 500  $\mu$ m; (f), 1  
 799 mm; (h), 100  $\mu$ m. Green codes the eGFP channel and magenta codes the mCherry  
 800 channel in all panels except in (b). Acronyms: *ic*, internal capsule; *ls*, lateral sulcus; *sts*,  
 801 superior temporal sulcus; others are listed in Supplementary Table 1.

802

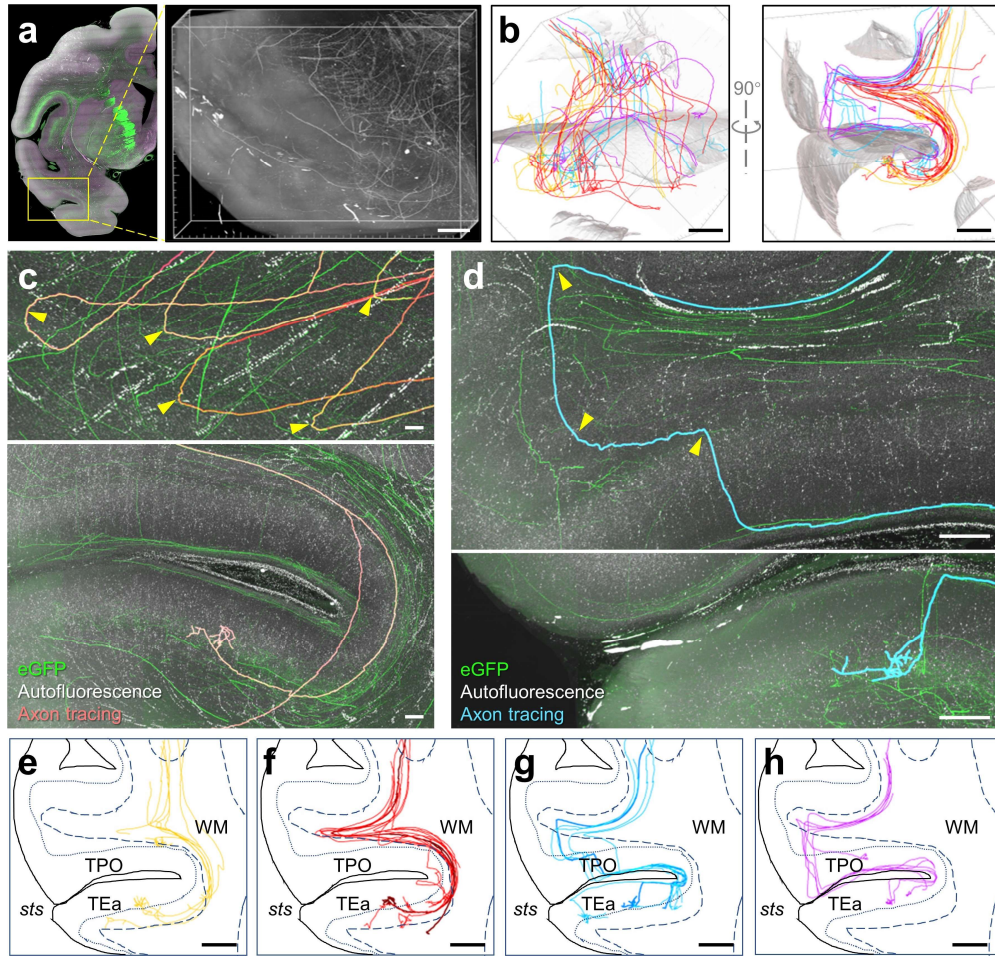

803

804 **Fig. 3 | Organization of axonal fibers in cortical folds.** (a) Overview of a 16×11×11  
805 mm<sup>3</sup> image volume surrounding the *sts* from an MD-injected macaque. (b) 30 traced  
806 axonal segments shown from two perspectives. Curved brain surfaces were segmented  
807 and rendered as a shaded reference to help visualize the location of axon trajectories.  
808 (c) Example images showing the sharp turns (arrowheads) of 5 axons (top) in the white  
809 matter (WM) and the arbor area of an axon (bottom). (d) Example images showing the  
810 right-angle turns (arrowheads) of an axon (top) and its arbors (bottom). Images in the top  
811 panels of (c) and (d) are MIPs of 450-µm virtual sections resliced in an orientation  
812 parallel to the fibers. The bottom images are MIPs of 1200-µm sections. (e-h) Four  
813 axonal navigation patterns, including: those following short paths (e), those making  
814 sharp turns (f), those making two-step right-angle turns (g), and those making right-angle  
815 turns (h). The boundaries of cortical surfaces are illustrated as solid lines; boundaries of  
816 the WM are illustrated as dashed lines. Cortical layer IV can be recognized as a dim  
817 band in the autofluorescence images; it is drawn with dotted lines. Fibers shown in (c)



818 and (d) are highlighted in (f) and (g), respectively. Scale bars: (a-b), (e-h), 2 mm; (c) and  
819 (d), 200  $\mu\text{m}$ . Acronyms: *sts*, superior temporal sulcus; TPO, *sts* dorsal bank area; TEa,  
820 *sts* ventral bank area; WM, white matter.  
821

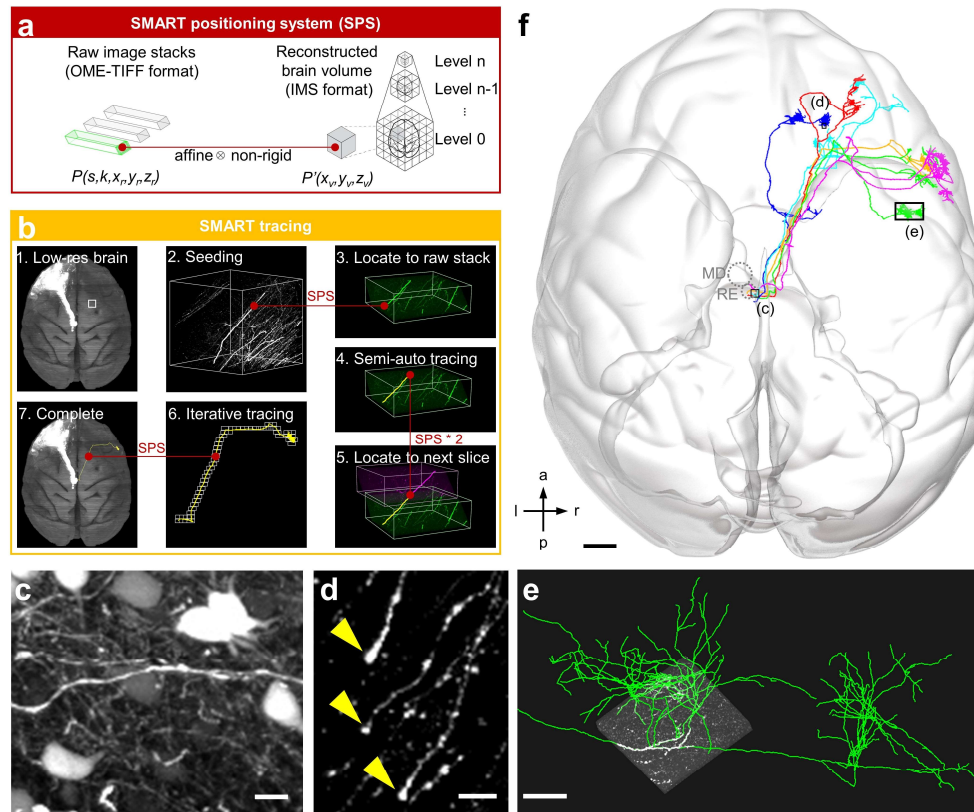

822

823 **Fig. 4 | Brain-wide tracing of axonal projections.** (a) The SMART positioning system  
 824 (SPS) maps between any position  $(x_r, y_r, z_r)$  in the raw image stack ( $k$ ) of a brain slice ( $s$ )  
 825 and the corresponding point  $(x_v, y_v, z_v)$  in the space of the reconstructed brain volume.  
 826 (b) Step-by-step workflow for SMART-based axonal tracing. Starting from a low-  
 827 resolution image (b1), a seed node was selected (b2) and located via SPS in the raw  
 828 image stack (b3); subsequent semi-automated tracing was conducted (b4) to navigate  
 829 through to the edge of the slice and beyond into the neighboring zone of the adjacent  
 830 slice as identified by SPS (b5). The entire axon can then be traced by iteratively applying  
 831 steps 4 and 5 (b6), and finally visualized in the reconstructed brain space by reverse  
 832 transformation of traced coordinates via SPS (b7). (c-d) Tracing was terminated at the  
 833 injection site where the axons were too dense (c) or at axonal termini (d). (e) Magnified  
 834 view of axonal terminals overlapped with a raw image block. (f) Six thalamocortical  
 835 axons projecting to the right hemisphere from the left MD or RE areas are shown. Scale  
 836 bars: (c), 20  $\mu\text{m}$ ; (d), 10  $\mu\text{m}$ ; (e), 500  $\mu\text{m}$ ; (f), 5 mm. Acronyms: MD, mediodorsal  
 837 nucleus; RE, reunions nucleus.

838

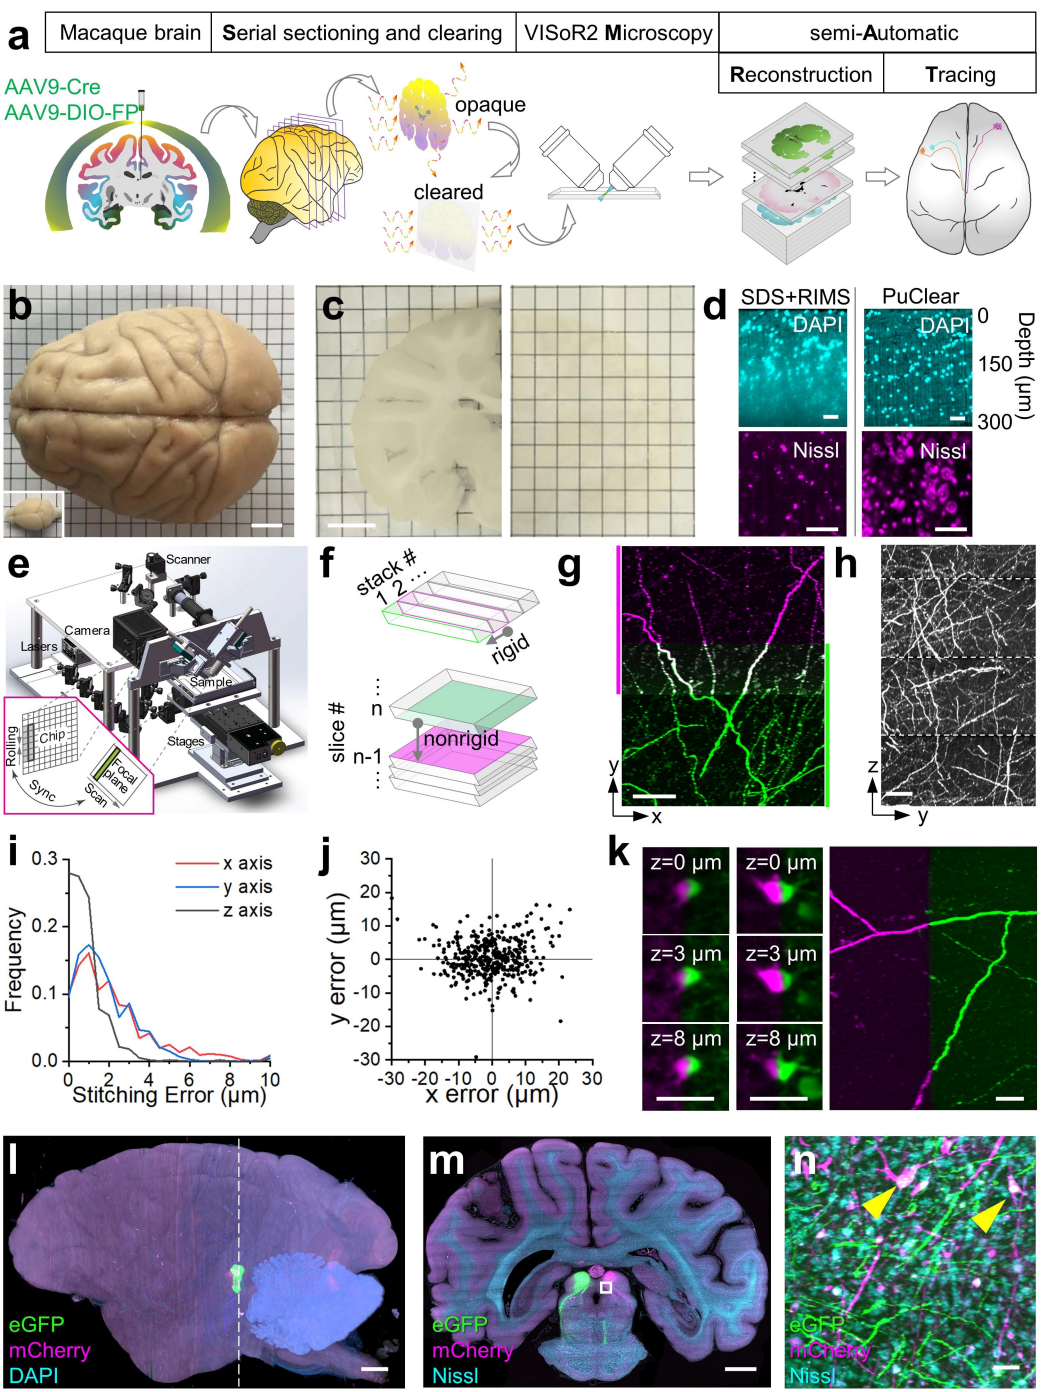



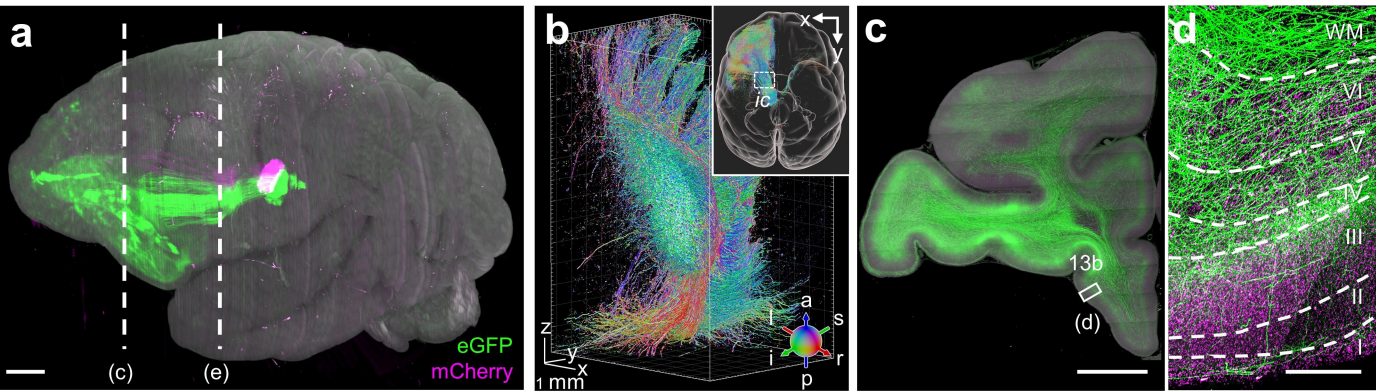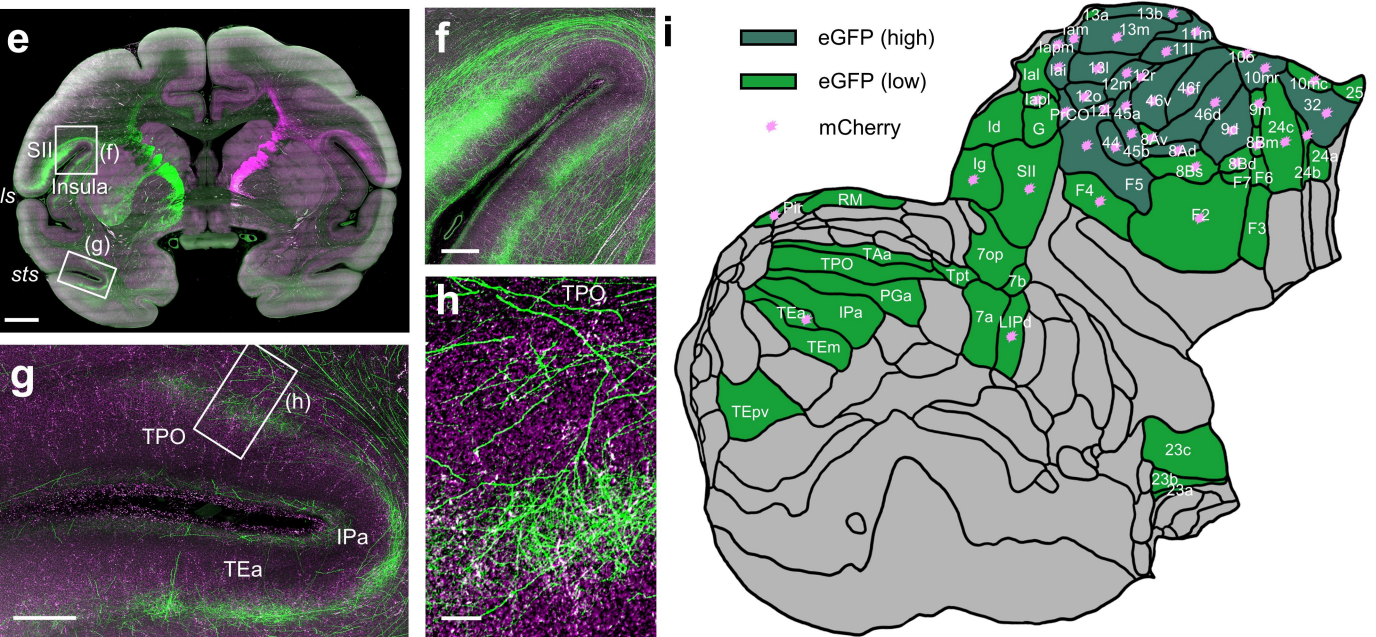

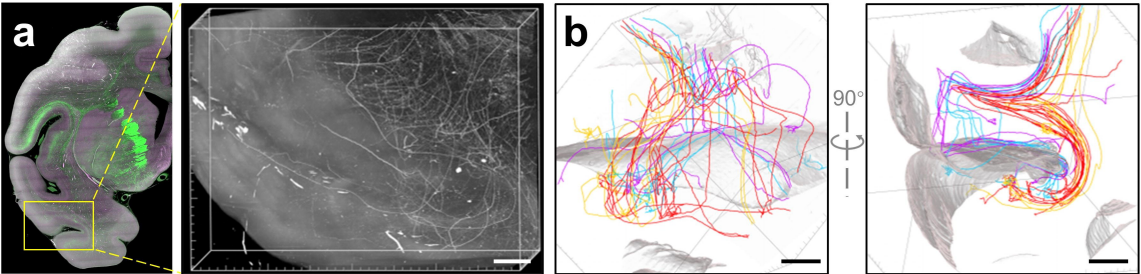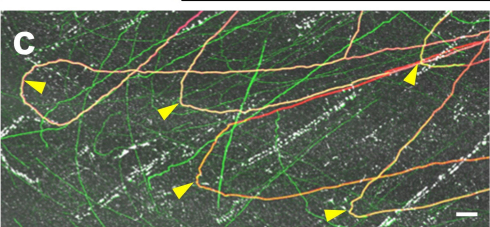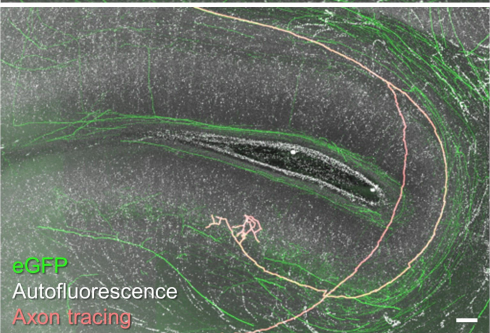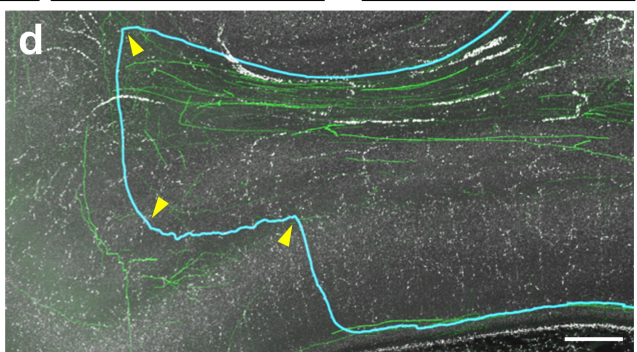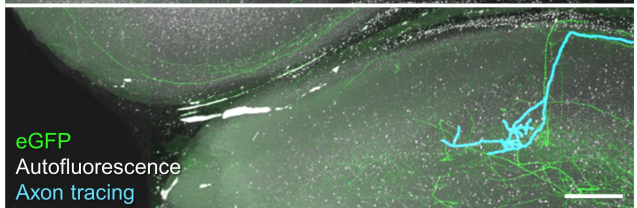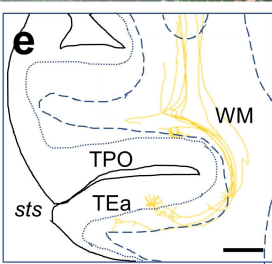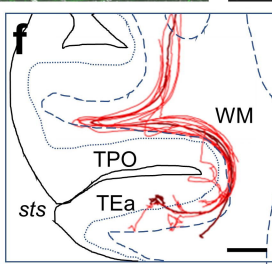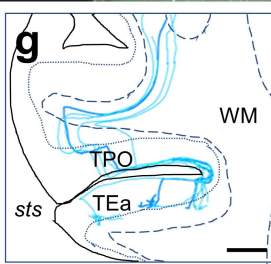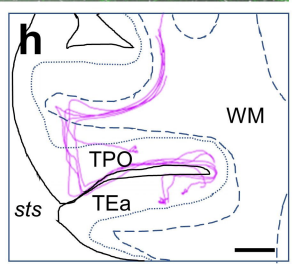



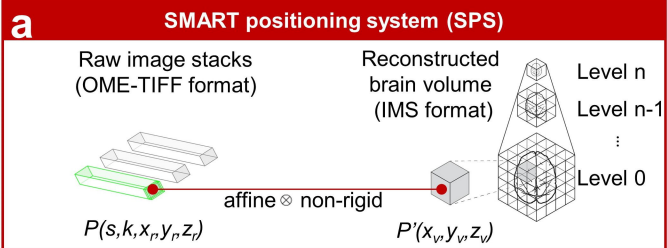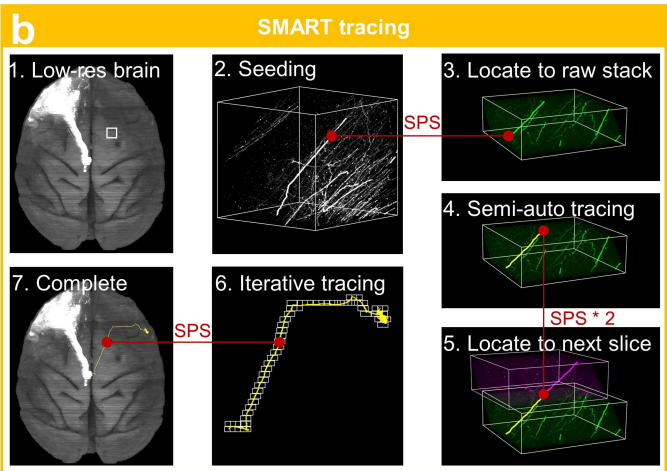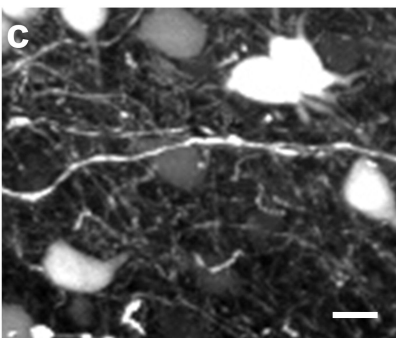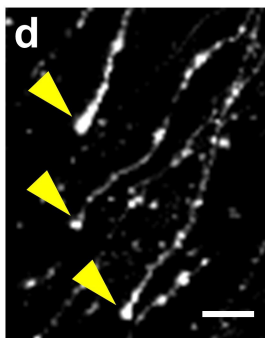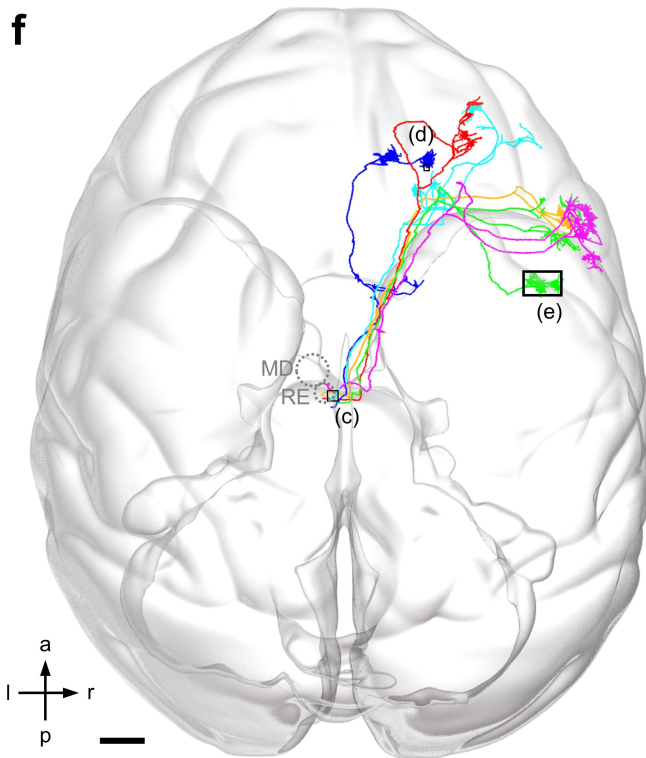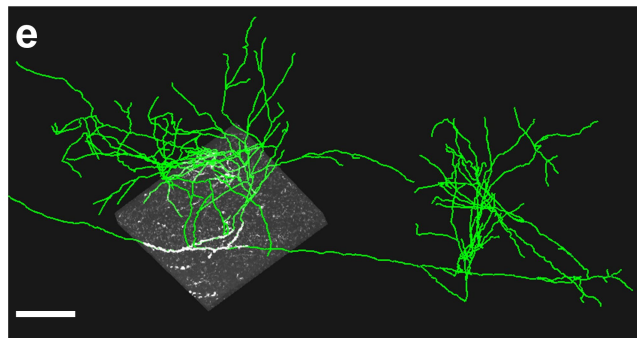

Source: https://www.biorxiv.org/content/10.1101/2020.09.25.313395v1.full.pdf
